# Supplementary material
Source: bioRxiv or medRxiv preprint supplement (https://www.biorxiv.org/highwire/filestream/77715/field_highwire_adjunct_files/0/213777-1.pdf)
Supplement: Supplementary file [file 213777-1.pdf]

## **Multivariate analysis of the cotton seed ionome reveals a shared genetic architecture**

Duke Pauli<sup>\*1</sup>, Greg Ziegler<sup>†,‡</sup>, Min Ren<sup>§</sup>, Matthew A. Jenks<sup>\*\*</sup>, Douglas J. Hunsaker<sup>††</sup>, Min Zhang<sup>§</sup>, Ivan Baxter<sup>†,‡</sup>, and Michael A. Gore<sup>\*</sup>

<sup>\*</sup>Plant Breeding and Genetics Section, School of Integrative Plant Science, Cornell University, Ithaca, NY 14853, USA

<sup>†</sup>Donald Danforth Plant Science Center, St. Louis, Missouri, USA

<sup>‡</sup>United States Department of Agriculture–Agricultural Research Service (USDA-ARS), Plant Genetics Research Unit, St. Louis, Missouri, USA

<sup>§</sup>Department of Statistics, Purdue University, West Lafayette, IN 47907, USA

<sup>\*\*</sup>Division of Plant and Soil Sciences, West Virginia University, Morgantown, WV 26506, USA

<sup>††</sup>United States Department of Agriculture–Agricultural Research Service (USDA-ARS), Arid-Land Agricultural Research Center, Maricopa, AZ 85138, USA

<sup>1</sup>Present address: School of Plant Sciences, University of Arizona, Tucson, AZ 85721, USA

### Corresponding author:

Michael A. Gore

358 Plant Science Building, Cornell University, Ithaca, NY 14853

Tel: +1 (607) 255-5492

E-mail: mag87@cornell.edu

## File S1-S4

**File S1.** Best linear unbiased predictors (BLUPs) for soil elemental concentrations within the experimental field site. The Microsoft Excel file contains the BLUPs from the mixed linear model fitted for the soil samples taken at five depths from each of the neutron probe access sites in years 2010 and 2012. The Universal Transverse Mercator (UTM, based on North American Datum 1983) coordinates, X UTM and Y UTM positions, are provided for each of the neutron probe access sites. Elemental concentrations are reported in parts per million (ppm).

**File S2.** Best linear unbiased estimators (BLUEs) for seed elemental concentrations. The Microsoft Excel file contains the BLUEs from the fitted mixed linear model for both the overall and by-year BLUEs calculated for the 95 recombinant inbred lines (RILs) and parents of the TM-1×NM24016 mapping population evaluated under water-limited (WL) and well-watered (WW) conditions. Parental lines were excluded for the purposes of quantitative trait loci (QTL) mapping. Seed elemental concentrations are reported as parts per billion (ppb).

**File S3.** Marker genotype data for the TM-1×NM24016 mapping population. The Microsoft Excel file contains the marker genotype scores for the 95 recombinant inbred lines (RILs) from the TM-1×NM24016 mapping population that were used in this work. The first three columns provide the genetic linkage map information from Gore, M. A. et al. 2014. *The Plant Genome* 7:1-10. Genotype marker data for the RILs are reported in columns D through CT, with a header labeled as NMXX where XX denotes the unique numeric identifier for each RIL that corresponds with the BLUEs in File S2. Marker data are coded for ICIM v. 4.0 with 2, 1, and 0 designating the homozygous parent 1 (TM-1), heterozygote, and homozygous parent 2 (NM24016) genotypic states, respectively, and -1 representing missing genotypic data. Genetic distances are reported in centiMorgans (cM).

**File S4.** Integration of the TM-1×NM24016 genetic linkage map with the *G. hirsutum* L. acc. TM-1 draft genome sequence. The Microsoft Excel file contains the genetic linkage map information from Gore, M. A. et al. 2014. *The Plant Genome* 7:1-10, and the results from aligning marker context sequences to the *G. hirsutum* L. acc. TM-1 draft genome sequence (NBI assembly v1.1, Zhang, T. et al. 2015. *Nature Biotechnology* 33:531-537). A complete description of the alignment process, including software used, is described in Pauli, D. et al. 2016a. *G3* 6:865-879. The assignment of linkage groups to the draft genome sequence do not represent definitive placement of markers with respect to physical position on the TM-1 genome.

**Supplemental Table 1.** F-values for fixed effects from the analysis of variance (ANOVA) of soil samples collected from the experimental field in which the TM1×NM24016 recombinant inbred line (RIL) population was evaluated at the Maricopa Agricultural Center in Maricopa, AZ. Soil sampling was performed in 2010 and 2012, with samples being collected at 5 depths: 0 – 30; 30 – 60; 60 – 90; 90 – 120; and 120 – 150 cm.

| Element | Year               | Depth      |
|---------|--------------------|------------|
| As      | 0.52 <sup>NS</sup> | 42.80****  |
| Ca      | 7.64*              | 134.70**** |
| Co      | 14.64*             | 63.16****  |
| Cu      | 9.78*              | 207.10**** |
| Fe      | 11.43*             | 43.17****  |
| K       | 84.95***           | 120.80**** |
| Mg      | 7.75*              | 3.80**     |
| Mn      | 11.91*             | 176.50**** |
| Mo      | 0.41 <sup>NS</sup> | 6.49****   |
| Ni      | 18.70*             | 70.06****  |
| P       | 0.22 <sup>NS</sup> | 39.62****  |
| Rb      | 30.10**            | 109.90**** |
| S       | 82.15****          | 26.86****  |
| Zn      | 31.01**            | 92.20****  |

NS Not Significant at the < 0.05 level.

\* Significant at the < 0.05 level.

\*\* Significant at the < 0.01 level.

\*\*\* Significant at the < 0.001 level.

\*\*\*\* Significant at the < 0.0001 level.

**Supplemental Table 2.** Geostatistical model parameters used for interpolation of soil element concentrations (kriging) across the experimental field at the Maricopa Agricultural Center in Maricopa, AZ, using the estimated best linear unbiased predictors (BLUPs) from a fitted linear mixed model. “Variance model” is the covariance structure used to account for spatial relationships of sampled data points. “Nugget” is the measurement error plus the variation that occurs over distances less than the shortest sampling interval. “Range” is the distance (m) at which spatial dependencies are no longer present, i.e., sampling points are spatially independent, and sill is the maximum variance at which this point occurs. SS Error, sums of squares error for the fitted model; NA, not applicable.

| Element | Log transformation | Variance model    | Nugget   | Range (m) | Sill     | SS Error |
|---------|--------------------|-------------------|----------|-----------|----------|----------|
| As      | No                 | Spherical         | 9.40E-02 | 16.79     | 4.42E-01 | 7.29E-03 |
| Ca      | Yes                | Spherical         | 1.47E-02 | 15.35     | 5.31E-02 | 1.97E-05 |
| Co      | No                 | Gaussian          | 2.91E-02 | 20.30     | 2.99E-02 | 7.94E-05 |
| Cu      | No                 | Spherical         | 1.91E-01 | 24.34     | 5.19E-01 | 9.90E-03 |
| Fe      | Yes                | Pentasphepherical | 5.67E-04 | 31.61     | 4.46E-04 | 1.23E-08 |
| K       | Yes                | Bessel            | 5.67E-04 | 12.49     | 1.19E-04 | 2.14E-09 |
| Mg      | Yes                | Pentasphepherical | 2.36E-03 | 24.98     | 1.23E-02 | 4.08E-06 |
| Mn      | No                 | Pentasphepherical | 2.26E+01 | 66.44     | 3.04E+01 | 3.01E+01 |
| Mo      | No                 | Pentasphepherical | 1.08E-03 | 12.59     | 3.91E-04 | 7.12E-08 |
| Ni      | No                 | Spherical         | 5.71E-02 | 26.51     | 1.14E-01 | 3.51E-04 |
| P       | Yes                | Spherical         | 3.97E-03 | 20.69     | 1.07E-02 | 2.12E-06 |
| Rb      | No                 | Pentasphepherical | 6.35E-01 | 39.09     | 7.09E-01 | 5.47E-02 |
| S       | Yes                | Nugget            | 2.60E-04 | NA        | 1.88E-12 | 7.44E-09 |
| Zn      | No                 | Pentasphepherical | 1.51E+00 | 35.72     | 1.33E+00 | 2.54E-01 |

**Supplemental Table 3.** Summary statistics for interpolated soil element concentrations. Means, standard deviations, minimum, maximum, and range of soil element concentrations (in parts per million) interpolated across the experimental field at the Maricopa Agricultural Center in Maricopa, AZ. Soil samples were collected from five depths at neutron probe installation sites that were distributed throughout the field in 2010 and 2012. For sulfur, no spatial pattern was observed. Therefore, only the nugget variance was used for modeling purposes, resulting in one interpolated value for the entire experimental field area. Nugget variance represents the measurement error plus the variation that occurs over distances less than the shortest sampling interval. NA, not available.

| Element | Mean     | Std. Dev. | Min.    | Max.     | Range   |
|---------|----------|-----------|---------|----------|---------|
| As      | 3.72     | 0.41      | 2.73    | 4.99     | 2.26    |
| Ca      | 8784.91  | 1092.17   | 5929.91 | 12809.64 | 6879.73 |
| Co      | 4.50     | 0.11      | 4.18    | 4.75     | 0.57    |
| Cu      | 15.42    | 0.49      | 13.95   | 16.51    | 2.57    |
| Fe      | 9184.29  | 122.20    | 8775.33 | 9424.81  | 649.48  |
| K       | 10140.95 | 104.14    | 9862.72 | 10353.72 | 491.00  |
| Mg      | 4774.15  | 311.36    | 3778.03 | 5455.11  | 1677.09 |
| Mn      | 256.44   | 3.88      | 244.98  | 264.99   | 20.02   |
| Mo      | 0.70     | 0.01      | 0.68    | 0.73     | 0.04    |
| Ni      | 7.95     | 0.23      | 7.15    | 8.53     | 1.37    |
| P       | 441.16   | 27.01     | 365.17  | 508.53   | 143.36  |
| Rb      | 21.76    | 0.58      | 19.70   | 23.32    | 3.62    |
| S       | 1089.90  | NA        | NA      | NA       | NA      |
| Zn      | 41.13    | 0.73      | 38.69   | 42.99    | 4.30    |

**Supplemental Table 4.** Fixed effects for elements. F-values for fixed effects from an analysis of variance (ANOVA) for the TM-1×NM24016 recombinant inbred line (RIL) population, its two parents, and commercial check varieties for elements analyzed in seed. Covariate indicates whether flowering time (i.e., time to first flower) or soil element concentration had a significant linear relationship with seed element concentration. Data were collected from 2010-12 at the Maricopa Agricultural Center located in Maricopa, AZ.

| Ion | Covariate type | Covariate | Genotype  | Irrigation regime  | Genotype*Irrigation regime |
|-----|----------------|-----------|-----------|--------------------|----------------------------|
| As  | Flowering      | 4.69*     | 4.81****  | 2.30 <sup>NS</sup> | 1.00 <sup>NS</sup>         |
| Ca  |                |           | 5.00****  | 6.97*              | 0.85 <sup>NS</sup>         |
| Co  | Soil element   | 13.70**** | 8.98****  | 0.11 <sup>NS</sup> | 1.66****                   |
| Cu  | Flowering      | 4.26*     | 18.86**** | 27.54****          | 1.26 <sup>NS</sup>         |
| Fe  |                |           | 8.83****  | 12.68**            | 0.93 <sup>NS</sup>         |
| K   |                |           | 5.11****  | 1.26 <sup>NS</sup> | 1.04 <sup>NS</sup>         |
| Mg  | Soil element   | 6.83**    | 9.82****  | 30.73****          | 1.20 <sup>NS</sup>         |
| Mn  |                |           | 11.75**** | 1.80 <sup>NS</sup> | 1.53**                     |
| Mo  |                |           | 3.24****  | 40.67****          | 1.30*                      |
| Ni  | Flowering      | 8.80**    | 10.76**** | 2.14 <sup>NS</sup> | 1.04 <sup>NS</sup>         |
| P   |                |           | 6.29****  | 3.17 <sup>NS</sup> | 0.67 <sup>NS</sup>         |
| Rb  | Soil element   | 46.89**** | 5.17****  | 4.07 <sup>NS</sup> | 1.01 <sup>NS</sup>         |
| S   |                |           | 8.34****  | 12.02**            | 8.34****                   |
| Zn  |                |           | 9.06****  | 19.99**            | 1.23 <sup>NS</sup>         |

<sup>NS</sup> Not Significant at the < 0.05 level.

\* Significant at the < 0.05 level.

\*\* Significant at the < 0.01 level.

\*\*\* Significant at the < 0.001 level.

\*\*\*\* Significant at the < 0.0001 level.

**Supplemental Table 5.** Phenotypic ( $\hat{r}_{pij}$ ) correlations with standard errors in parenthesis between the 14 elements evaluated in the TM-1×NM24016 recombinant inbred line (RIL) mapping population evaluated under contrasting irrigation regimes, water-limited (WL, values above the diagonal) and well-watered (WW, below the diagonal). Field trials were conducted from 2010-12 at the Maricopa Agricultural Center located in Maricopa, AZ.

|    | Mg           | Cu           | Ca           | Ni           | Co          | As           | Rb           | Fe           | K            | Mn           | Mo          | P            | S            | Zn           |
|----|--------------|--------------|--------------|--------------|-------------|--------------|--------------|--------------|--------------|--------------|-------------|--------------|--------------|--------------|
| Mg |              | 0.35 (0.09)  | 0.45 (0.08)  | 0.36 (0.09)  | 0.11 (0.10) | -0.35 (0.11) | 0.22 (0.10)  | 0.54 (0.07)  | 0.01 (0.10)  | 0.55 (0.07)  | 0.14 (0.10) | 0.66 (0.06)  | 0.22 (0.09)  | 0.66 (0.06)  |
| Cu | 0.39 (0.08)  |              | 0.30 (0.09)  | 0.19 (0.10)  | 0.15 (0.10) | 0.06 (0.10)  | 0.19 (0.10)  | 0.47 (0.08)  | 0.04 (0.10)  | 0.34 (0.09)  | 0.24 (0.09) | 0.35 (0.09)  | 0.24 (0.09)  | 0.46 (0.08)  |
| Ca | 0.43 (0.08)  | 0.20 (0.10)  |              | 0.32 (0.09)  | 0.13 (0.10) | -0.26 (0.11) | -0.03 (0.10) | 0.35 (0.09)  | -0.13 (0.10) | 0.60 (0.06)  | 0.11 (0.10) | 0.48 (0.08)  | 0.09 (0.10)  | 0.43 (0.08)  |
| Ni | 0.41 (0.08)  | 0.25 (0.09)  | 0.33 (0.09)  |              | 0.31 (0.09) | -0.33 (0.13) | 0.29 (0.09)  | 0.50 (0.07)  | 0.00 (0.10)  | 0.39 (0.08)  | 0.18 (0.09) | 0.50 (0.07)  | -0.03 (0.10) | 0.56 (0.07)  |
| Co | 0.14 (0.10)  | 0.25 (0.09)  | 0.13 (0.10)  | 0.35 (0.09)  |             | 0.13 (0.10)  | 0.06 (0.10)  | 0.30 (0.09)  | 0.28 (0.09)  | 0.30 (0.09)  | 0.22 (0.09) | 0.22 (0.09)  | 0.06 (0.10)  | 0.36 (0.09)  |
| As | -0.29 (0.11) | -0.03 (0.10) | -0.32 (0.11) | -0.26 (0.12) | 0.07 (0.10) |              | -0.04 (0.11) | -0.24 (0.12) | 0.17 (0.09)  | -0.07 (0.11) | 0.01 (0.10) | -0.26 (0.12) | 0.08 (0.10)  | -0.31 (0.13) |
| Rb | 0.20 (0.10)  | 0.16 (0.10)  | 0.17 (0.10)  | 0.24 (0.09)  | 0.08 (0.10) | -0.09 (0.11) |              | 0.19 (0.09)  | 0.33 (0.09)  | 0.25 (0.09)  | 0.07 (0.10) | 0.05 (0.10)  | 0.03 (0.10)  | 0.28 (0.09)  |
| Fe | 0.53 (0.07)  | 0.54 (0.07)  | 0.32 (0.09)  | 0.60 (0.06)  | 0.39 (0.08) | -0.15 (0.11) | 0.14 (0.10)  |              | 0.22 (0.09)  | 0.59 (0.06)  | 0.17 (0.09) | 0.47 (0.08)  | 0.16 (0.10)  | 0.77 (0.04)  |
| K  | -0.10 (0.10) | 0.05 (0.10)  | -0.11 (0.10) | -0.03 (0.10) | 0.10 (0.10) | 0.02 (0.10)  | 0.30 (0.09)  | 0.07 (0.10)  |              | 0.30 (0.09)  | 0.01 (0.10) | -0.04 (0.10) | 0.12 (0.10)  | 0.01 (0.10)  |
| Mn | 0.59 (0.06)  | 0.37 (0.09)  | 0.51 (0.07)  | 0.44 (0.08)  | 0.30 (0.09) | -0.19 (0.12) | 0.28 (0.09)  | 0.57 (0.07)  | 0.15 (0.10)  |              | 0.18 (0.09) | 0.36 (0.09)  | 0.08 (0.10)  | 0.57 (0.07)  |
| Mo | 0.13 (0.10)  | 0.27 (0.09)  | 0.19 (0.09)  | 0.33 (0.09)  | 0.23 (0.09) | 0.00 (0.10)  | 0.01 (0.10)  | 0.29 (0.09)  | 0.02 (0.10)  | 0.21 (0.09)  |             | 0.21 (0.09)  | 0.40 (0.08)  | 0.23 (0.09)  |
| P  | 0.63 (0.06)  | 0.43 (0.08)  | 0.43 (0.08)  | 0.57 (0.07)  | 0.23 (0.09) | -0.20 (0.12) | 0.11 (0.10)  | 0.52 (0.07)  | -0.05 (0.10) | 0.44 (0.08)  | 0.34 (0.08) |              | 0.16 (0.10)  | 0.65 (0.06)  |
| S  | 0.24 (0.09)  | 0.18 (0.10)  | 0.15 (0.10)  | 0.19 (0.10)  | 0.13 (0.10) | 0.04 (0.10)  | 0.11 (0.10)  | 0.20 (0.09)  | 0.22 (0.09)  | 0.16 (0.10)  | 0.52 (0.07) | 0.29 (0.09)  |              | 0.14 (0.10)  |
| Zn | 0.64 (0.06)  | 0.51 (0.07)  | 0.41 (0.08)  | 0.61 (0.06)  | 0.35 (0.09) | -0.30 (0.13) | 0.23 (0.09)  | 0.72 (0.05)  | -0.06 (0.10) | 0.55 (0.07)  | 0.28 (0.09) | 0.64 (0.06)  | 0.27 (0.09)  |              |

**Supplemental Table 6.** Genotypic ( $\hat{r}_{gij}$ ) correlations with standard errors in parenthesis between the 14 elements evaluated in the TM-1×NM24016 recombinant inbred line (RIL) mapping population evaluated under contrasting irrigation regimes, water-limited (WL, values above the diagonal) and well-watered (WW, below the diagonal). Field trials were conducted from 2010-12 at the Maricopa Agricultural Center located in Maricopa, AZ.

|    | Mg           | Cu           | Ca           | Ni           | Co          | As           | Rb           | Fe           | K            | Mn           | Mo          | P            | S            | Zn           |
|----|--------------|--------------|--------------|--------------|-------------|--------------|--------------|--------------|--------------|--------------|-------------|--------------|--------------|--------------|
| Mg |              | 0.36 (0.09)  | 0.46 (0.08)  | 0.37 (0.09)  | 0.11 (0.10) | -0.35 (0.11) | 0.22 (0.10)  | 0.55 (0.07)  | 0.01 (0.10)  | 0.57 (0.07)  | 0.14 (0.10) | 0.67 (0.06)  | 0.22 (0.10)  | 0.67 (0.06)  |
| Cu | 0.40 (0.09)  |              | 0.30 (0.09)  | 0.19 (0.10)  | 0.15 (0.10) | 0.06 (0.10)  | 0.19 (0.10)  | 0.48 (0.08)  | 0.04 (0.10)  | 0.35 (0.09)  | 0.25 (0.10) | 0.37 (0.09)  | 0.25 (0.10)  | 0.46 (0.08)  |
| Ca | 0.44 (0.08)  | 0.20 (0.10)  |              | 0.33 (0.09)  | 0.13 (0.10) | -0.26 (0.11) | -0.03 (0.10) | 0.36 (0.09)  | -0.13 (0.10) | 0.61 (0.07)  | 0.11 (0.10) | 0.50 (0.08)  | 0.09 (0.10)  | 0.44 (0.08)  |
| Ni | 0.41 (0.09)  | 0.25 (0.10)  | 0.34 (0.09)  |              | 0.31 (0.09) | -0.34 (0.13) | 0.29 (0.09)  | 0.52 (0.08)  | 0.00 (0.10)  | 0.40 (0.09)  | 0.19 (0.10) | 0.51 (0.08)  | -0.04 (0.10) | 0.56 (0.07)  |
| Co | 0.14 (0.10)  | 0.26 (0.10)  | 0.13 (0.10)  | 0.36 (0.09)  |             | 0.13 (0.10)  | 0.06 (0.10)  | 0.31 (0.09)  | 0.28 (0.10)  | 0.31 (0.09)  | 0.21 (0.10) | 0.24 (0.10)  | 0.07 (0.10)  | 0.37 (0.09)  |
| As | -0.30 (0.11) | -0.03 (0.10) | -0.32 (0.11) | -0.27 (0.13) | 0.07 (0.10) |              | -0.04 (0.11) | -0.24 (0.13) | 0.17 (0.10)  | -0.07 (0.11) | 0.01 (0.11) | -0.26 (0.13) | 0.09 (0.10)  | -0.32 (0.13) |
| Rb | 0.21 (0.10)  | 0.16 (0.10)  | 0.17 (0.10)  | 0.25 (0.09)  | 0.09 (0.10) | -0.09 (0.11) |              | 0.20 (0.09)  | 0.33 (0.09)  | 0.26 (0.09)  | 0.07 (0.10) | 0.05 (0.10)  | 0.03 (0.10)  | 0.28 (0.09)  |
| Fe | 0.55 (0.07)  | 0.55 (0.07)  | 0.33 (0.09)  | 0.62 (0.07)  | 0.41 (0.09) | -0.16 (0.12) | 0.15 (0.10)  |              | 0.23 (0.10)  | 0.61 (0.07)  | 0.17 (0.10) | 0.48 (0.08)  | 0.16 (0.10)  | 0.78 (0.04)  |
| K  | -0.10 (0.10) | 0.05 (0.10)  | -0.11 (0.10) | -0.03 (0.10) | 0.09 (0.10) | 0.02 (0.11)  | 0.31 (0.09)  | 0.06 (0.1)   |              | 0.30 (0.09)  | 0.00 (0.10) | -0.05 (0.10) | 0.12 (0.10)  | 0.01 (0.10)  |
| Mn | 0.61 (0.07)  | 0.37 (0.09)  | 0.51 (0.08)  | 0.45 (0.08)  | 0.30 (0.09) | -0.19 (0.12) | 0.28 (0.09)  | 0.59 (0.07)  | 0.15 (0.10)  |              | 0.18 (0.10) | 0.37 (0.09)  | 0.08 (0.10)  | 0.57 (0.07)  |
| Mo | 0.14 (0.10)  | 0.28 (0.10)  | 0.19 (0.10)  | 0.36 (0.09)  | 0.24 (0.10) | 0.00 (0.11)  | 0.01 (0.11)  | 0.30 (0.1)   | 0.01 (0.10)  | 0.21 (0.10)  |             | 0.23 (0.10)  | 0.41 (0.09)  | 0.24 (0.10)  |
| P  | 0.64 (0.06)  | 0.44 (0.08)  | 0.44 (0.08)  | 0.59 (0.07)  | 0.24 (0.10) | -0.21 (0.12) | 0.11 (0.10)  | 0.52 (0.08)  | -0.07 (0.10) | 0.45 (0.08)  | 0.37 (0.09) |              | 0.17 (0.10)  | 0.66 (0.06)  |
| S  | 0.24 (0.10)  | 0.18 (0.10)  | 0.15 (0.10)  | 0.20 (0.10)  | 0.13 (0.10) | 0.04 (0.01)  | 0.11 (0.10)  | 0.20 (0.10)  | 0.22 (0.10)  | 0.17 (0.10)  | 0.54 (0.08) | 0.29 (0.10)  |              | 0.14 (0.10)  |
| Zn | 0.65 (0.06)  | 0.51 (0.08)  | 0.41 (0.09)  | 0.61 (0.06)  | 0.36 (0.09) | -0.31 (0.13) | 0.24 (0.09)  | 0.73 (0.05)  | -0.06 (0.10) | 0.55 (0.07)  | 0.29 (0.10) | 0.66 (0.06)  | 0.28 (0.10)  |              |



**Supplemental Table 7.** Summary of quantitative trait loci (QTL) mapped using Bayesian classification mapping for 14 elements in the TM-1×NM24016 recombinant inbred line (RIL) population evaluated under contrasting irrigation regimes, water-limited (WL) and well-watered (WW) conditions, at the Maricopa Agricultural Center, Maricopa, AZ. Quantitative trait loci (QTL) significance is based on the reported Bayes factor with values larger than 100 indicating “decisive evidence” for a QTL, see Jeffreys (1961) for further details. Marker positions are reported as centimorgans (cM).

| Element | QTL name              | Irrigation regime <sup>a</sup> | Chr. <sup>b</sup> | LG <sup>c</sup> | Peak marker position (cM) | Peak marker | Bayes factor <sup>d</sup> | Beta <sup>e</sup> | SD <sup>f</sup> |
|---------|-----------------------|--------------------------------|-------------------|-----------------|---------------------------|-------------|---------------------------|-------------------|-----------------|
| As      | <i>qAs.A12.45.18</i>  | WW                             | A12               | 45              | 18.12                     | SNP0327     | 884.70                    | 0.45              | 0.13            |
|         | <i>qAs.A05.75.09</i>  | WW                             | A05               | 75              | 9.29                      | SNP0099     | 263.91                    | 0.41              | 0.21            |
|         | <i>qAs.D06.110.12</i> | WW                             | D06               | 110             | 12.38                     | DPL0080a    | 1.95E+07                  | 0.68              | 0.21            |
|         | <i>qAs.D06.112.04</i> | WW                             | D06               | 112             | 3.67                      | BNL1047a    | 1.76E+06                  | 0.63              | 0.26            |
| Ca      | <i>qCa.A06.19.07</i>  | WL                             | A06               | 19              | 7.31                      | SNP0479     | 800.14                    | -0.54             | 0.20            |
|         | <i>qCa.A12.45.18</i>  | WW                             | A12               | 45              | 18.12                     | SNP0327     | 214.06                    | -0.48             | 0.18            |
|         | <i>qCa.A06.117.22</i> | WW                             | A06               | 117             | 21.66                     | SNP0031     | 145.83                    | -0.46             | 0.23            |
| Cu      | <i>qCu.A07.28.00</i>  | WL                             | A07               | 28              | 0.00                      | DC30012a    | 4.50E+15                  | -1.38             | 0.31            |
|         | <i>qCu.A07.28.00</i>  | WW                             | A07               | 28              | 0.00                      | DC30012a    | 1484.98                   | -0.54             | 0.28            |
|         | <i>qCu.D01.64.20</i>  | WW                             | D01               | 64              | 19.55                     | SNP0026     | 134.95                    | -0.46             | 0.18            |
| Fe      | <i>qFe.A05.74.16</i>  | WL                             | A05               | 74              | 16.41                     | SNP0316     | 2.87E+06                  | -0.71             | 0.21            |
|         | <i>qFe.D12.116.00</i> | WL                             | D12               | 116             | 0.00                      | C2-055a     | 240.34                    | -0.44             | 0.16            |
| K       | <i>qK.A09.33.00</i>   | WW                             | A09               | 33              | 0.00                      | SHIN-0817a  | 1.41E+04                  | 0.63              | 0.15            |
|         | <i>qK.A10.87.03</i>   | WW                             | A10               | 87              | 3.31                      | SNP0312     | 1128.73                   | 0.52              | 0.23            |
|         | <i>qK.A11.91.25</i>   | WW                             | A11               | 91              | 24.87                     | SNP0382     | 1.26E+09                  | 0.88              | 0.15            |
| Mg      | <i>qMg.A11.44.27</i>  | WL                             | A11               | 44              | 27.39                     | NAU2152a    | 1511.42                   | -0.49             | 0.15            |
|         | <i>qMg.A12.45.21</i>  | WL                             | A12               | 45              | 21.39                     | SNP0047     | 1.37E+04                  | -0.53             | 0.14            |
|         | <i>qMg.A12.45.21</i>  | WW                             | A12               | 45              | 21.39                     | SNP0047     | 898.58                    | -0.52             | 0.16            |
|         | <i>qMg.D07.66.21</i>  | WL                             | D07               | 66              | 21.30                     | BNL1227a    | 117.73                    | -0.39             | 0.15            |
|         | <i>qMg.A05.74.16</i>  | WL                             | A05               | 74              | 16.41                     | SNP0316     | 194.18                    | -0.40             | 0.21            |
|         | <i>qMg.A06.117.22</i> | WW                             | A06               | 117             | 21.66                     | SNP0031     | 1329.09                   | -0.53             | 0.19            |
| Mo      | <i>qMo.A02.69.00</i>  | WL                             | A02               | 69              | 0.00                      | JESPR101a   | 283.57                    | -0.49             | 0.16            |
| Ni      | <i>qNi.D01.64.20</i>  | WL                             | D01               | 64              | 19.55                     | SNP0026     | 120.92                    | -0.38             | 0.17            |

|    |                       |    |     |     |       |            |          |       |      |
|----|-----------------------|----|-----|-----|-------|------------|----------|-------|------|
|    | <i>qNi.A05.74.05</i>  | WW | A05 | 74  | 4.77  | SNP0055    | 795.22   | -0.49 | 0.15 |
|    | <i>qNi.A05.74.13</i>  | WL | A05 | 74  | 12.52 | SNP0035    | 4176.56  | -0.46 | 0.21 |
|    | <i>qNi.D12.116.00</i> | WL | D12 | 116 | 0.00  | C2-055a    | 155.76   | -0.38 | 0.14 |
|    | <i>qNi.D12.116.00</i> | WW | D12 | 116 | 0.00  | C2-055a    | 582.49   | -0.47 | 0.24 |
| P  | <i>qP.A03.06.34</i>   | WL | A03 | 6   | 33.92 | SNP0130    | 7960.08  | -0.62 | 0.15 |
|    | <i>qP.A11.43.14</i>   | WL | A11 | 43  | 14.42 | DPL1121a   | 170.76   | -0.47 | 0.18 |
|    | <i>qP.A05.74.05</i>   | WL | A05 | 74  | 4.77  | SNP0055    | 102.23   | -0.45 | 0.17 |
|    | <i>qP.A05.74.05</i>   | WW | A05 | 74  | 4.77  | SNP0055    | 3.12E+05 | -0.70 | 0.24 |
| Rb | <i>qRb.A05.14.02</i>  | WW | A05 | 14  | 2.02  | SNP0155    | 1492.16  | -0.51 | 0.16 |
|    | <i>qRb.A08.30.14</i>  | WW | A08 | 30  | 13.63 | SNP0214    | 392.68   | -0.45 | 0.23 |
|    | <i>qRb.A12.45.00</i>  | WW | A12 | 45  | 0.00  | SNP0264    | 115.62   | -0.42 | 0.19 |
|    | <i>qRb.D10.83.18</i>  | WW | D10 | 83  | 17.96 | SHIN-1586a | 7471.98  | -0.56 | 0.15 |
|    | <i>qRb.D06.112.25</i> | WW | D06 | 112 | 25.00 | DC30135a   | 247.30   | -0.45 | 0.15 |
| Zn | <i>qZn.A05.74.13</i>  | WW | A05 | 74  | 12.52 | SNP0035    | 1050.32  | -0.52 | 0.22 |
|    | <i>qZn.A05.74.16</i>  | WL | A05 | 74  | 16.41 | SNP0316    | 133.68   | -0.43 | 0.27 |

- a. Irrigation regime, irrigation regime for which a QTL was identified.
- b. Chr., chromosome on which the marker is located based on Pauli et al. (2016a).
- c. LG, linkage group.
- d. Bayes factor, converted posterior probability indicating likelihood of QTL presence.
- e. Beta, fitted regression coefficient for respective marker in model.
- f. SD, standard deviation of the regression coefficient, beta, from fitted model.

**Supplemental Table 8.** Summary of significant quantitative trait loci (QTL) identified using the multi-trait analysis approach of seemingly unrelated regression (SUR) to map two independent groupings of elements in the TM-1×NM24016 recombinant inbred line (RIL) population evaluated under contrasting irrigation regimes, water-limited (WL) and well-watered (WW) conditions, at the Maricopa Agricultural Center, Maricopa, AZ. Select elements were combined into biologically relevant groupings based on biochemical function as outlined in Taiz and Zeiger (2006) and Mengel and Kirkby (2012). The “ionic” group consists of calcium, potassium, magnesium, and manganese, whereas the “redox” group is composed of iron, zinc, copper, nickel, and molybdenum. The *P*-values associated with the respective marker is significant at a Bonferroni-corrected threshold of  $\alpha = 0.05$ . Marker positions are reported as centimorgans (cM).

| Category | QTL name                | Peak Marker | Chr. <sup>a</sup> | LG <sup>b</sup> | Peak Marker Position (cM) | Irrigation regime | SUR <i>P</i> -value |
|----------|-------------------------|-------------|-------------------|-----------------|---------------------------|-------------------|---------------------|
| Redox    | <i>qRedox.A03.05.14</i> | SNP0023     | A03               | 5               | 13.94                     | WW                | 9.96E-08            |
| Redox    | <i>qRedox.A03.06.27</i> | SNP0286     | A03               | 6               | 26.83                     | WL                | 2.44E-08            |
|          |                         |             |                   |                 |                           | WW                | 6.58E-08            |
| Ionic    | <i>qIonic.A03.09.10</i> | SHIN-0473a  | A03               | 9               | 10.34                     | WL                | 5.60E-06            |
| Redox    | <i>qRedox.A06.17.14</i> | SNP0191     | A06               | 17              | 14.08                     | WW                | 1.34E-05            |
| Ionic    | <i>qIonic.A06.19.07</i> | SNP0479     | A06               | 19              | 7.31                      | WL                | 5.08E-05            |
| Redox    | <i>qRedox.A06.19.11</i> | SNP0404     | A06               | 19              | 10.62                     | WL                | 3.78E-05            |
| Ionic    | <i>qIonic.A07.24.17</i> | CIR238a     | A07               | 24              | 16.60                     | WW                | 4.94E-05            |
| Redox    | <i>qRedox.A07.28.00</i> | DC30012a    | A07               | 28              | 0.00                      | WL                | 1.36E-09            |
|          |                         |             |                   |                 |                           | WW                | 3.88E-05            |
| Ionic    | <i>qIonic.A09.33.17</i> | TMB2483a    | A09               | 33              | 17.12                     | WL                | 1.18E-06            |
|          |                         |             |                   |                 |                           | WW                | 9.14E-06            |
| Ionic    | <i>qIonic.A11.39.01</i> | DPL1931a    | A11               | 39              | 0.53                      | WL                | 8.46E-06            |
|          |                         |             |                   |                 |                           | WW                | 4.47E-05            |
| Ionic    | <i>qIonic.A11.41.02</i> | DPL1379a    | A11               | 41              | 1.57                      | WL                | 1.10E-06            |
|          |                         |             |                   |                 |                           | WW                | 1.49E-06            |
| Ionic    | <i>qIonic.A11.42.06</i> | SNP0258     | A11               | 42              | 5.86                      | WL                | 1.54E-05            |
| Redox    | <i>qRedox.A11.44.00</i> | SNP0058     | A11               | 44              | 0.00                      | WW                | 4.28E-05            |
| Ionic    | <i>qIonic.A12.47.06</i> | SNP0265     | A12               | 47              | 6.11                      | WL                | 5.59E-05            |
| Ionic    | <i>qIonic.A12.50.01</i> | BNL0666     | A12               | 50              | 0.69                      | WL                | 2.31E-05            |
| Redox    | <i>qRedox.D12.52.07</i> | SNP0348     | D12               | 52              | 6.58                      | WL                | 1.41E-05            |

|       |                          |            |     |     |       |    |          |
|-------|--------------------------|------------|-----|-----|-------|----|----------|
|       |                          |            |     |     |       | WW | 3.19E-06 |
| Ionic | <i>qIonic.D02.59.00</i>  | BNL4061a   | D02 | 59  | 0.00  | WL | 2.02E-05 |
|       |                          |            |     |     |       | WW | 1.96E-05 |
| Ionic | <i>qIonic.A01.61.09</i>  | TMB1931a   | A01 | 61  | 9.32  | WL | 5.67E-05 |
|       |                          |            |     |     |       | WW | 9.02E-07 |
| Redox | <i>qRedox.D01.64.20</i>  | SNP0026    | D01 | 64  | 19.55 | WL | 9.02E-07 |
|       |                          |            |     |     |       | WW | 1.10E-06 |
| Redox | <i>qRedox.A02.69.00</i>  | JESPR101a  | A02 | 69  | 0.00  | WL | 4.58E-06 |
|       |                          |            |     |     |       | WW | 6.84E-09 |
| Redox | <i>qRedox.A05.74.05</i>  | SNP0055    | A05 | 74  | 4.77  | WL | 6.84E-09 |
|       |                          |            |     |     |       | WW | 5.66E-08 |
| Redox | <i>qRedox.A05.74.16</i>  | SNP0316    | A05 | 74  | 16.41 | WL | 6.24E-09 |
|       |                          |            |     |     |       | WW | 5.62E-07 |
| Ionic | <i>qIonic.D05.76.13</i>  | DPL0595a   | D05 | 76  | 12.82 | WL | 7.85E-07 |
|       |                          |            |     |     |       | WW | 6.91E-07 |
| Ionic | <i>qIonic.D05.80.17</i>  | SNP0196    | D05 | 80  | 16.96 | WW | 1.28E-05 |
|       |                          |            |     |     |       | WL | 1.45E-09 |
| Redox | <i>qRedox.D10.88.10</i>  | SNP0064    | D10 | 88  | 9.85  | WL | 1.45E-09 |
|       |                          |            |     |     |       | WW | 3.48E-06 |
| Ionic | <i>qIonic.A11.91.23</i>  | SNP0227    | A11 | 91  | 22.70 | WW | 2.38E-05 |
|       |                          |            |     |     |       | WL | 1.01E-06 |
| Ionic | <i>qIonic.D11.92.00</i>  | SHIN-1214b | D11 | 92  | 0.00  | WW | 6.61E-06 |
|       |                          |            |     |     |       | WL | 6.06E-06 |
| Ionic | <i>qIonic.D04.95.00</i>  | BNL4030a   | D04 | 95  | 0.00  | WL | 6.06E-06 |
|       |                          |            |     |     |       | WW | 3.03E-06 |
| Ionic | <i>qIonic.D09.97.05</i>  | SNP0114    | D09 | 97  | 4.77  | WW | 3.03E-06 |
|       |                          |            |     |     |       | WL | 5.28E-05 |
| Redox | <i>qRedox.D08.105.04</i> | SNP0005    | D08 | 105 | 3.52  | WL | 5.28E-05 |
|       |                          |            |     |     |       | WW | 2.78E-05 |
| Ionic | <i>qIonic.A06.117.22</i> | SNP0031    | A06 | 117 | 21.66 | WW | 1.24E-05 |

a. Chr., chromosome on which the marker is located based on Pauli et al. (2016a).

b. LG, linkage group.

**Supplemental Table 9.** Comparison of marker loci that were below the critical threshold in the Bayesian classification method (Bayes factor of 100), but were detected using the multi-trait mapping method of seemingly unrelated regression (SUR) in two irrigation regimes, water-limited (WL) and well-watered (WW). Tables A and B display results associated with the multi-element grouping of ionic (Ca, K, Mg, and Mn) and redox (Cu, Fe, Mo, Ni, and Zn) in the multi-trait analysis. The *P*-value associated with the significant marker identified in the multi-trait analysis is significant at a Bonferroni-corrected  $\alpha = 0.05$ .

**A. Ionic: Ca, K, Mg, and Mn**

| Marker information |                   |                 |          | Irrigation Regime <sup>a</sup> | Bayes factors for single elements |      |    |    | SUR <i>P</i> -value |
|--------------------|-------------------|-----------------|----------|--------------------------------|-----------------------------------|------|----|----|---------------------|
| Marker             | Chr. <sup>b</sup> | LG <sup>c</sup> | Position |                                | Ca                                | K    | Mg | Mn |                     |
| TMB2483a           | A09               | 33              | 17.12    | WW                             | 4.48                              | -    | -  | -  | 9.14E-06            |
| DPL1379a           | A11               | 41              | 1.57     | WW                             | -                                 | -    | -  | -  | 1.49E-06            |
| SNP0265            | A12               | 47              | 6.11     | WL                             | 1.02                              | -    | -  | -  | 5.59E-05            |
| BNL0666            | A12               | 50              | 0.69     | WL                             | -                                 | 2.55 | -  | -  | 2.31E-05            |
| TMB1931a           | A01               | 61              | 9.32     | WL                             | 2.48                              | -    | -  | -  | 5.67E-05            |
| DPL0595a           | D05               | 76              | 12.82    | WL                             | -                                 | 0.21 | -  | -  | 7.85E-07            |

**B. Redox: Cu, Fe, Mo, Ni, and Zn**

| Marker information |                   |                 |          | Irrigation Regime <sup>a</sup> | Bayes factors for single elements |      |       |    |      | SUR <i>P</i> -value |
|--------------------|-------------------|-----------------|----------|--------------------------------|-----------------------------------|------|-------|----|------|---------------------|
| Marker             | Chr. <sup>b</sup> | LG <sup>c</sup> | Position |                                | Cu                                | Fe   | Mo    | Ni | Zn   |                     |
| SNP0023            | A03               | 5               | 13.94    | WW                             | -                                 | 3.94 | -     | -  | -    | 9.96E-08            |
| SNP0058            | A11               | 44              | 0.00     | WW                             | -                                 | -    | 29.61 | -  | 1.23 | 4.28E-05            |
| SNP0348            | D12               | 52              | 6.58     | WW                             | 1.54                              | -    | -     | -  | -    | 3.19E-06            |
| SNP0005            | D08               | 105             | 3.52     | WW                             | -                                 | -    | -     | -  | 0.61 | 2.78E-05            |

a. Irrigation regime, irrigation regime for which a QTL was identified.

b. Chr., chromosome on which the marker is located based on Pauli et al. (2016).

c. LG, linkage group.

d. SUR *P*-value, *P*-value from the multi-trait analysis using seemingly unrelated regression.

Element = Arsenic, Variance model = Sph

A

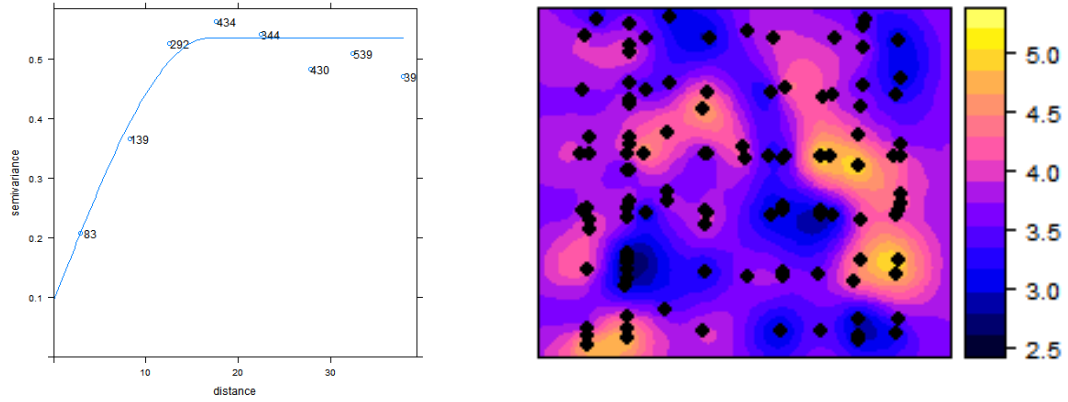

Element = Calcium, Variance model = Sph

B

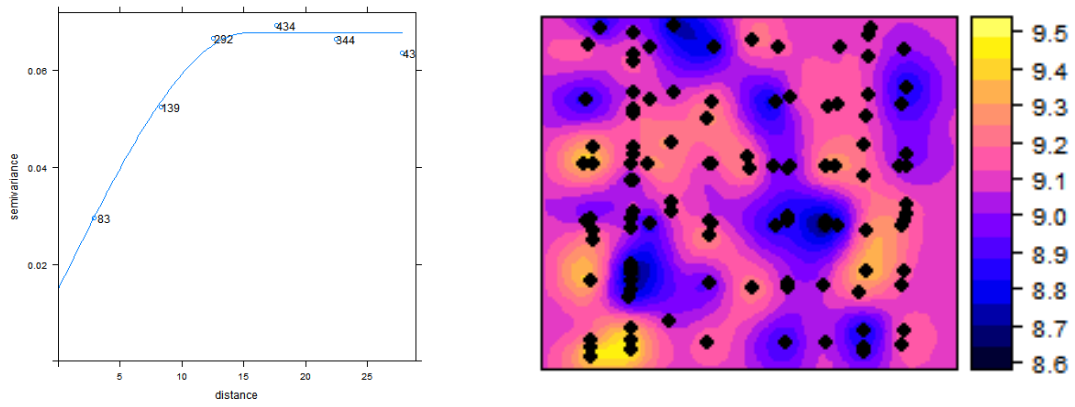

Element = Cobalt, Variance model = Gau

C

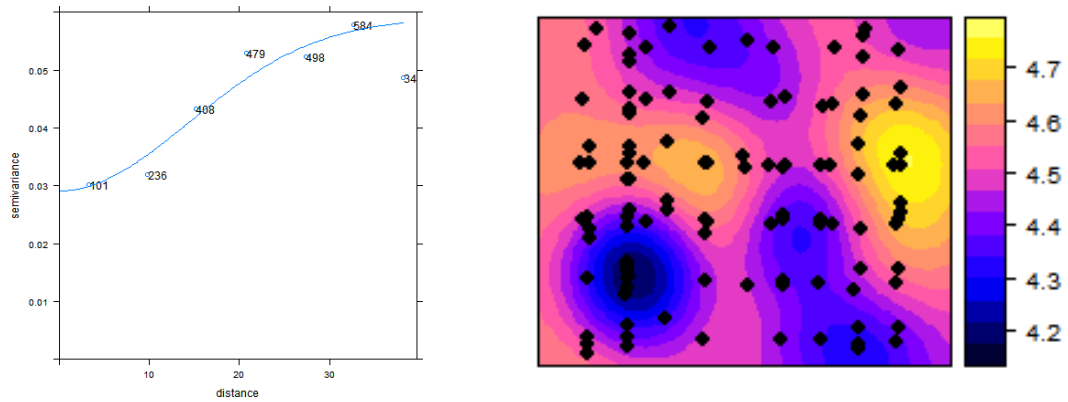

Element = Copper, Variance model = Sph

D

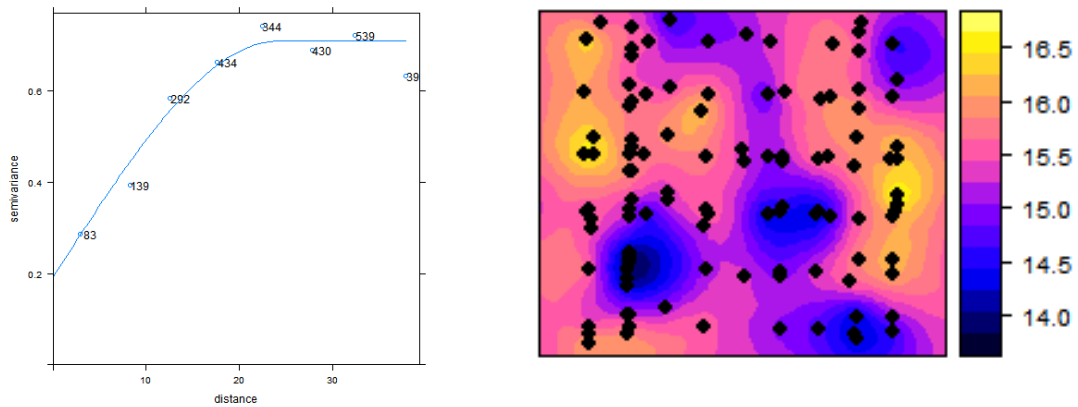

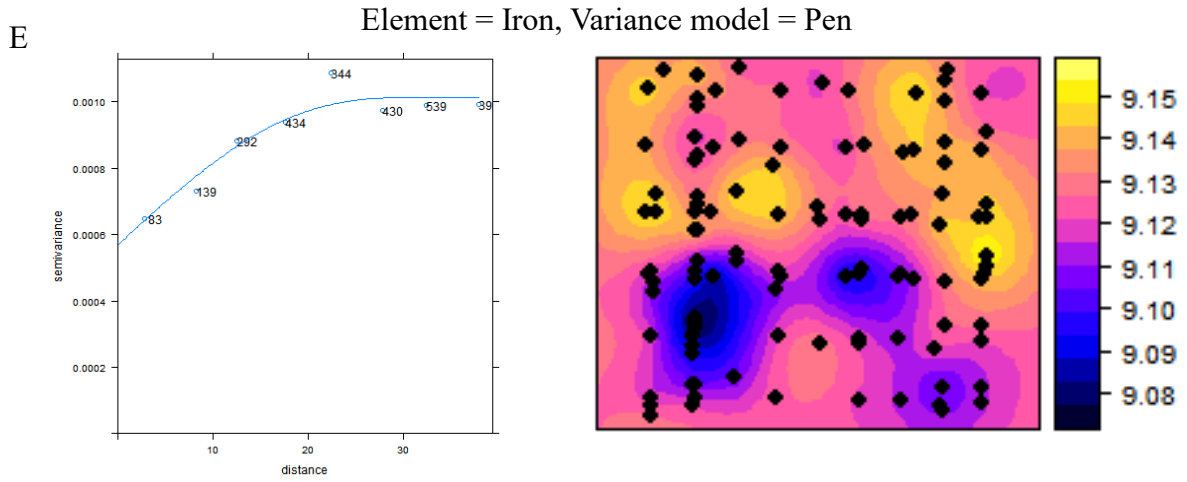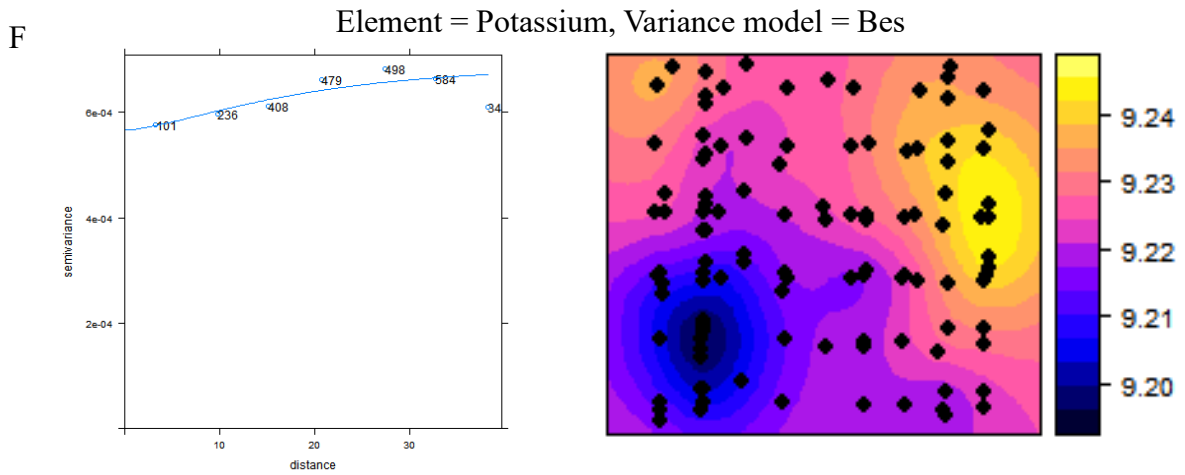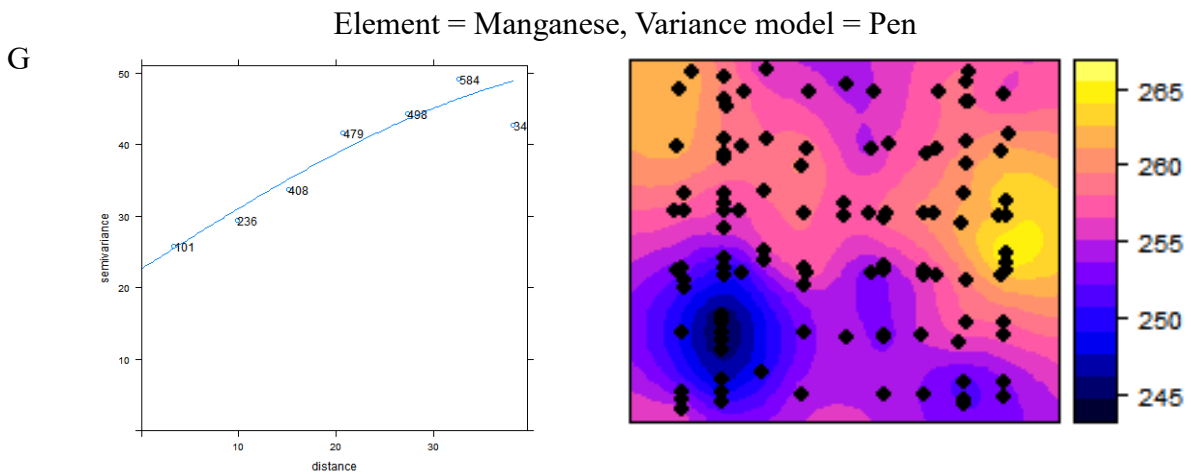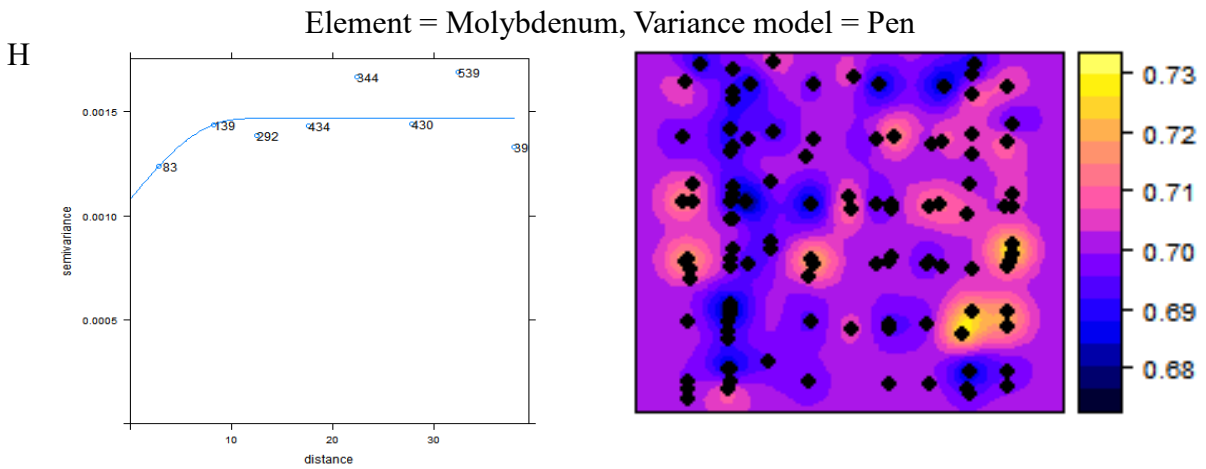

Element = Nickel, Variance model = Sph

I

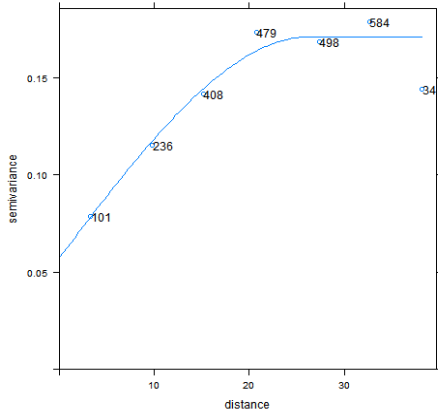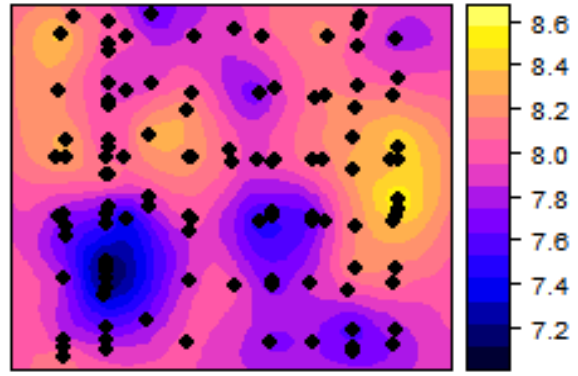

Element = Phosphorus, Variance model = Sph

J

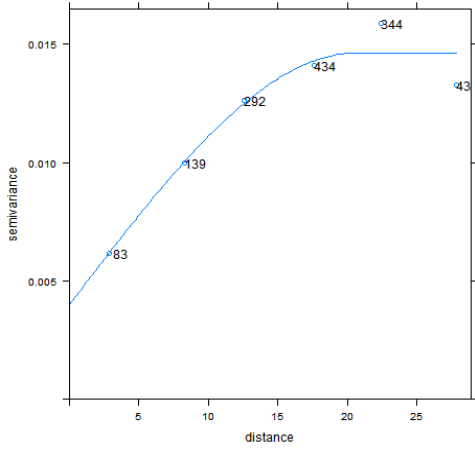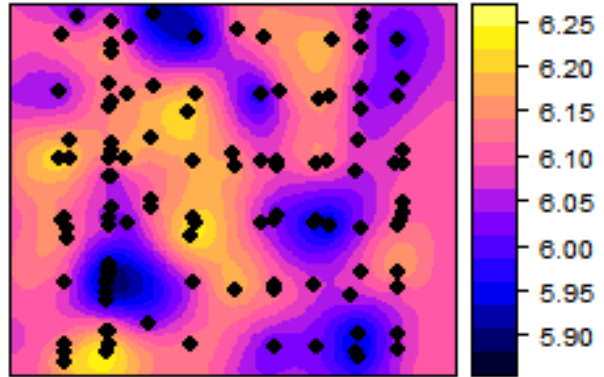

Element = Rubidium, Variance model = Pen

K

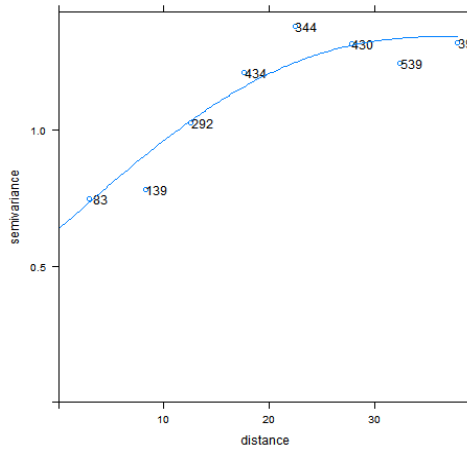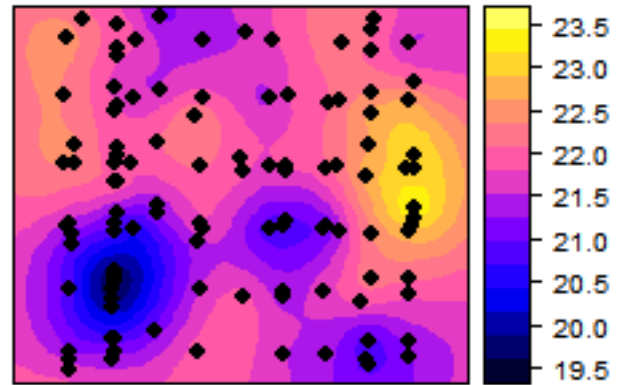

Element = Sulfur, Variance model = Nug

L

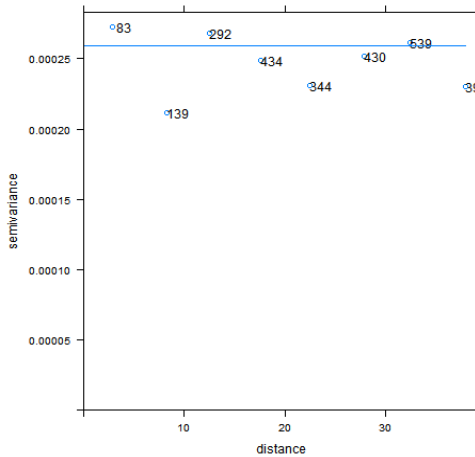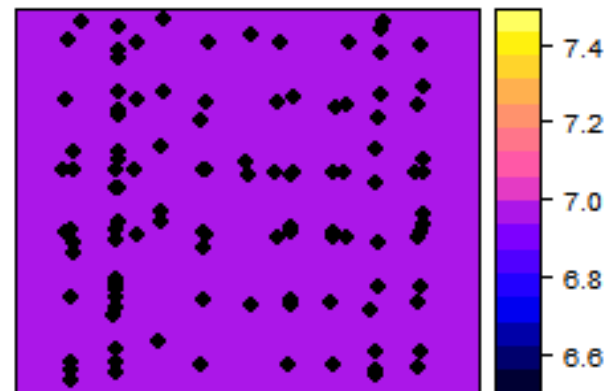



M

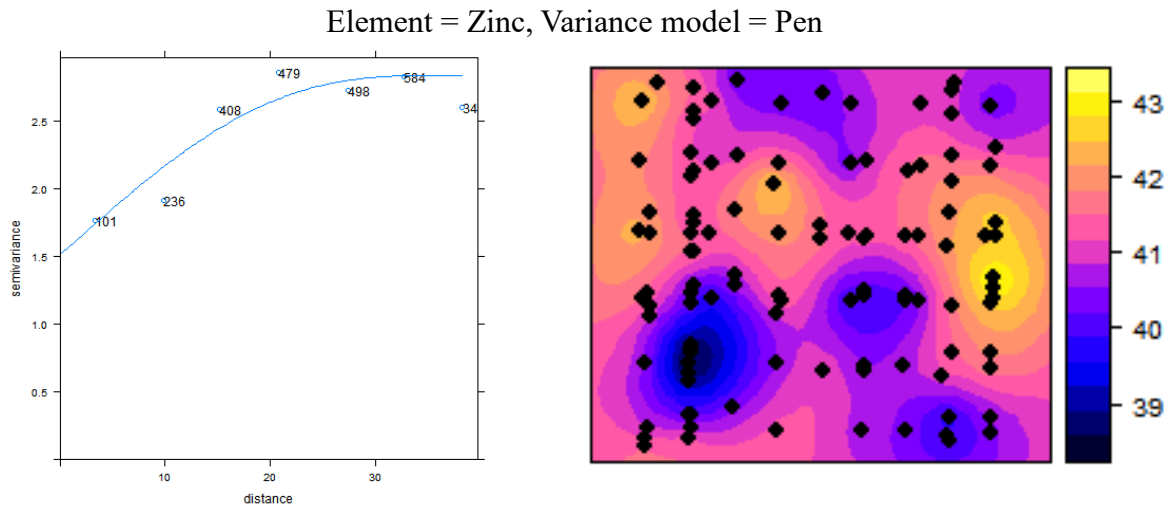

Figure S1. Characterization of soil elemental profile in 2010 and 2012 for A) arsenic, B) calcium, C) cobalt, D) copper, E) iron, F) potassium, G) manganese, H) molybdenum, I) nickel, J) phosphorus, K) rubidium, L) sulfur, and M) zinc in the field site where the mapping population was evaluated. The left-hand panel represents spatial continuity of elemental variation within the field site in terms of the correlation among sampling-site elemental concentrations at a given distance, in meters. Values within the plot area denote the total number of point pairs at the respective distances. The right-hand panel is the interpolated elemental concentrations throughout the field site. The values for arsenic, calcium, iron, phosphorus, and potassium were log transformed prior to model fitting. Variance models used for kriging: Bes, Bessel; Gau, Gaussian; Nug, Nugget, Pen, Pentaspherical; and Sph, spherical.
